# Supplementary material for: Aluminum nanoparticles manufactured using a ball-milling method with ammonium chloride as a grinding aid: achieving energy release at low temperature
Source: Royal Society of Chemistry journal article supplement (doi:10.1039/c8nj05356a), 2018-12-11
Supplement: c8nj05356a1.pdf [file c8nj05356a1.pdf]

## Supplementary Material

### **Aluminum nanoparticles manufactured by ball-milling method using ammonium chloride as a grinding aid: achieving energy release at low temperature.**

Aifeng Jiang,<sup>a</sup> Fang Wang,<sup>b</sup> Debin Xia,<sup>\*a</sup> Mengru Li,<sup>a</sup> Liangsheng Qiang,<sup>a</sup> Zhaoyang Zhu,<sup>a</sup> Ping Wang,<sup>a</sup> Ruiqing Fan,<sup>a</sup> Kaifeng Lin,<sup>a</sup> and Yulin Yang<sup>\*a</sup>

<sup>a</sup>MIT Key Laboratory of Critical Materials Technology for New Energy Conversion and Storage, School of Chemistry and Chemical Engineering, Harbin Institute of Technology, Harbin 150001, P. R. China.

<sup>b</sup> Shanghai Academy of Spaceflight Technology, Shanghai 201100, China

\* Corresponding author. MIT Key Laboratory of Critical Materials Technology for New Energy Conversion and Storage, School of Chemistry and Chemical Engineering, Harbin Institute of Technology, Harbin 150001, P. R. China.

E-mail addresses: xia@hit.edu.cn (D.B. Xia), ylyang@hit.edu.cn (Y.L. Yang).

### **Table of Contents**

|                                                                                                           |            |
|-----------------------------------------------------------------------------------------------------------|------------|
| <b>Section 1. Cold welding photograph of aluminum powders.....</b>                                        | <b>S-2</b> |
| <b>Section 2. SEM images of aluminum particles.....</b>                                                   | <b>S-2</b> |
| <b>Section 3. Photographs of unpassivated and passivated aluminum nanoparticles .....</b>                 | <b>S-3</b> |
| <b>Section 4. The zoomed-in XRD patterns of aluminum nanoparticles and micron aluminum powders.....</b>   | <b>S-4</b> |
| <b>Section 5. IR spectra of aluminum (III) acetylacetonate and passivated aluminum nanoparticles.....</b> | <b>S-4</b> |
| <b>Section 6. EPR spectra of unpassivated and passivated aluminum nanoparticles .....</b>                 | <b>S-5</b> |

## Section 1. Cold welding photograph of aluminum powders.

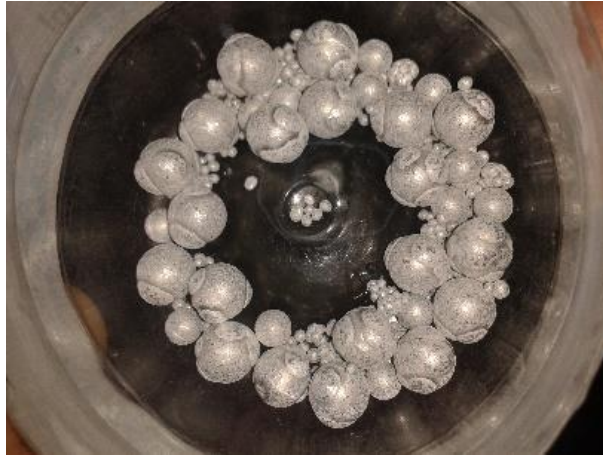

**Fig. S1** Cold welding photograph of aluminum powders ball milled for 14 h without using  $\text{NH}_4\text{Cl}$ .

## Section 2. SEM images of aluminum particles.

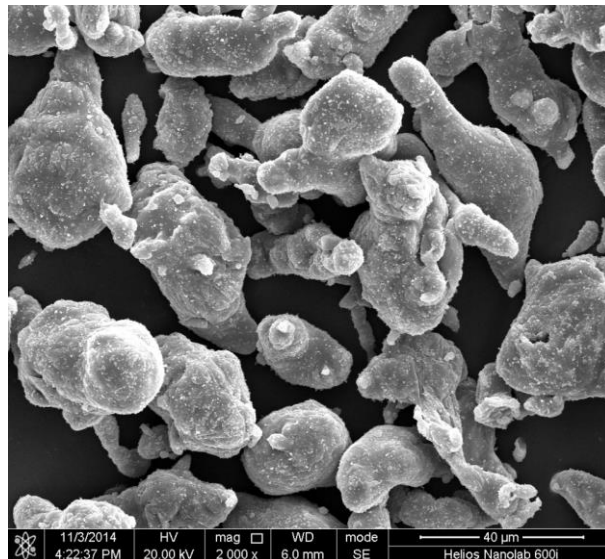

**Fig. S2** SEM image of raw micron aluminum powders.

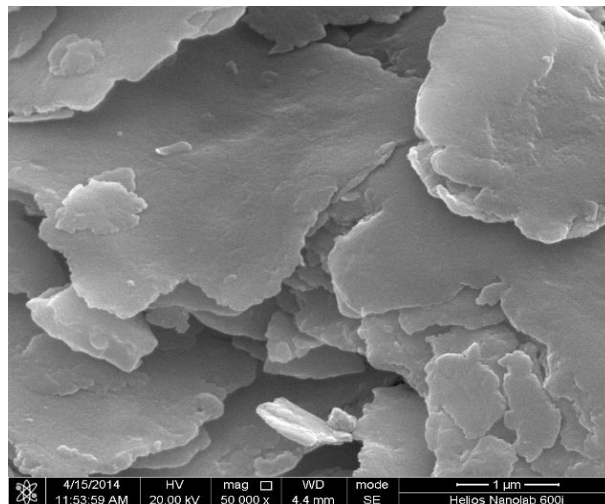

**Fig. S3** SEM image of aluminum particles ball milled for 2 h.

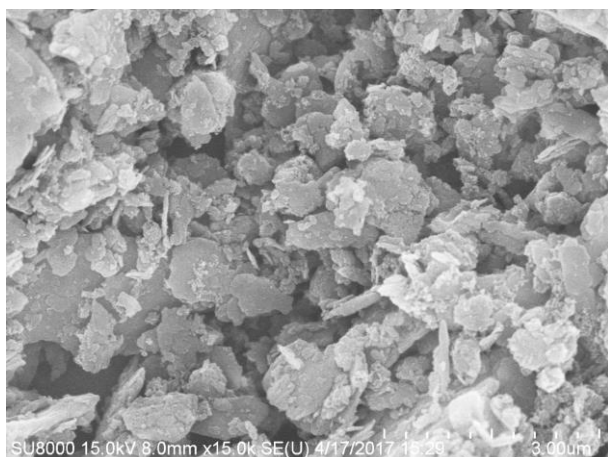

**Fig. S4** SEM image of aluminum particles ball milled for 4 h.

### **Section 3. Photographs of unpassivated and passivated aluminum nanoparticles.**

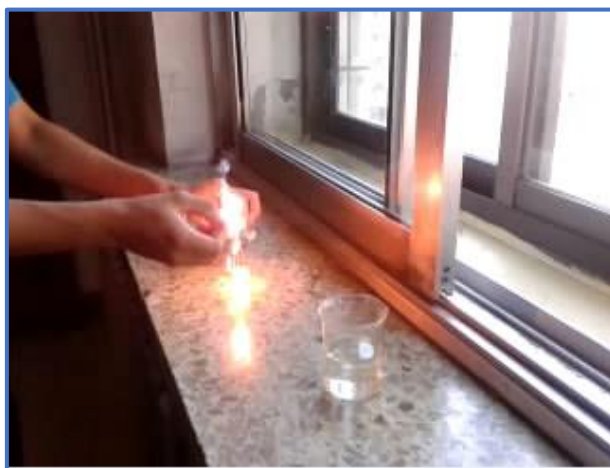

**Fig. S5** Photograph of bare aluminum particles ball milled for 14 h in the open air atmosphere.

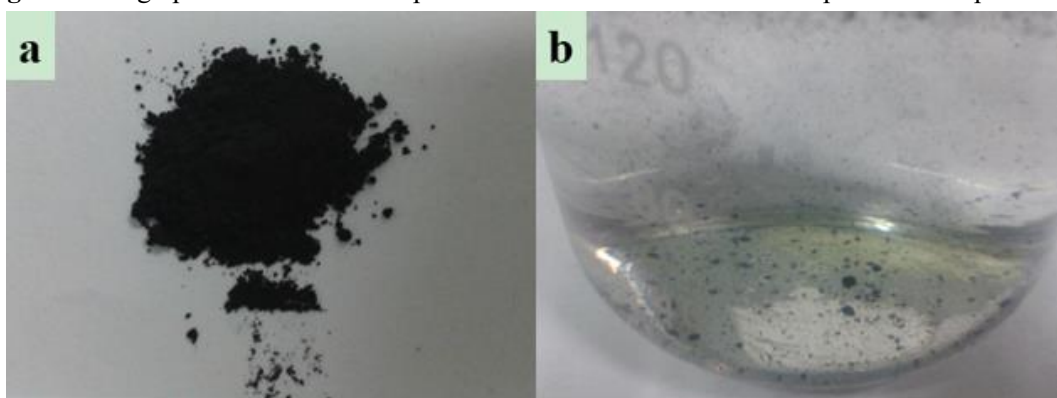

**Fig. S6** (a) Photograph of passivated aluminum particles ball milled for 14 h in the open air atmosphere; (b) photograph of passivated aluminum particles ball milled for 14 h in water.

#### Section 4. The zoomed-in XRD patterns of aluminum nanoparticles and micron aluminum powders.

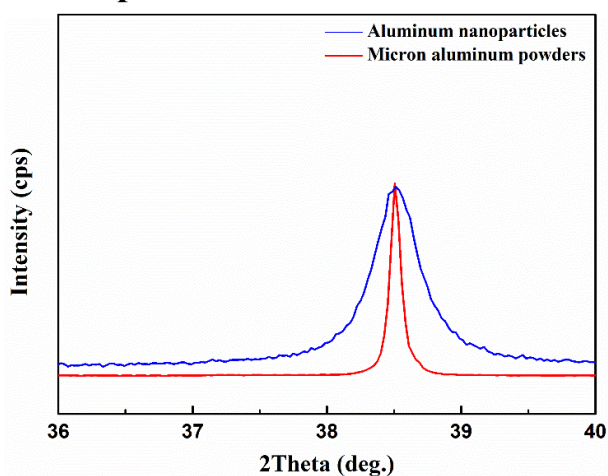

**Fig. S7** The corresponding zoomed-in XRD patterns for (111) planes of passivated aluminum nanoparticles and micron aluminum in the regions 36-40°.

#### Section 5. IR spectra of aluminum (III) acetylacetonate and passivated aluminum nanoparticles.

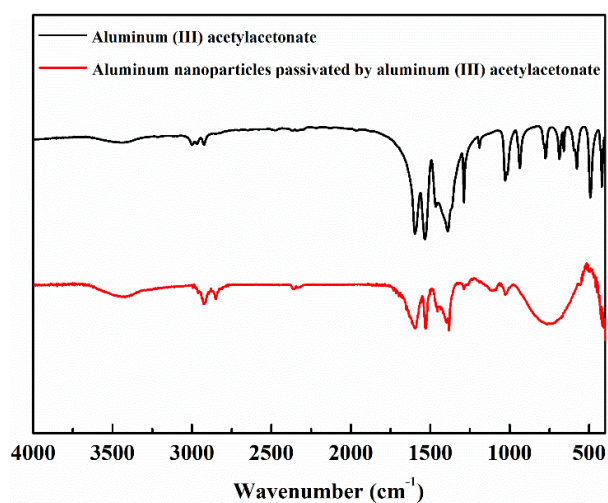

**Fig. S8** Infrared spectra of aluminum (III) acetylacetonate and passivated aluminum nanoparticles.

## Section 6. EPR spectra of unpassivated and passivated aluminum nanoparticles.

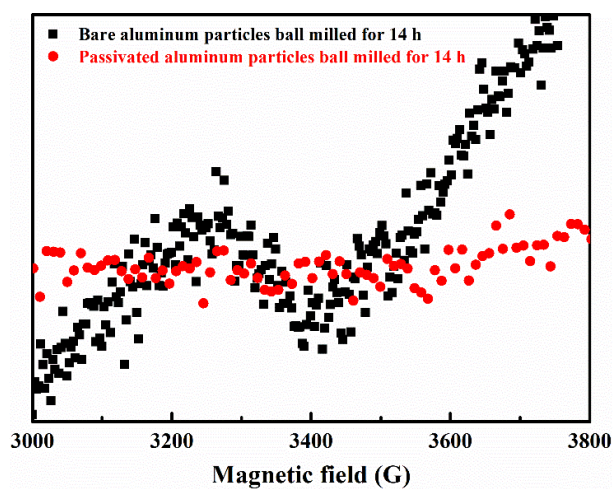

**Fig. S9** EPR spectra of bare aluminum particles ball milled for 14 h and passivated aluminum particles ball milled for 14 h.
